# Supplementary material
Source: publisher figshare collection journal article supplement (https://acs.figshare.com/ndownloader/files/3872866)
Supplement: Supplementary file 1 [file 3872866]

**Supporting Information**

# Luminescent Nanoparticles with Lanthanide-Containing Poly(ethylene glycol)-Poly( $\epsilon$ -caprolactone) Block Copolymers

David C. Thévenaz, Christophe A. Monnier, Sandor Balog, and Gina L. Fiore

*Adolphe Merkle Institute, University of Fribourg, Chemin des Verdiers 4 CH-1700, Fribourg, Switzerland*

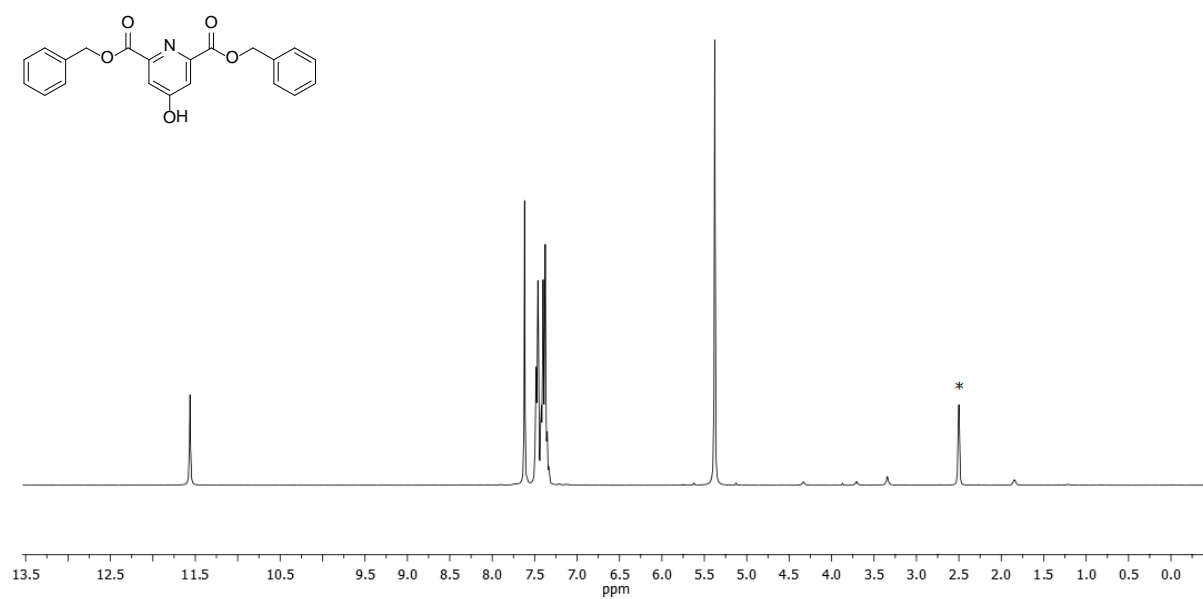

**Figure S1.** <sup>1</sup>H NMR spectrum of 4-hydroxypyridine-2,6-dicarboxylic acid dibenzyl ester, **2**. <sup>1</sup>H NMR (300 MHz, DMSO-*d*<sub>6</sub>) δ 11.56 (s, 1H, PyrOH), 7.79–7.08 (m, 12H, ArH, PyrH), 5.38 (s, 4H, CH<sub>2</sub>Ph).

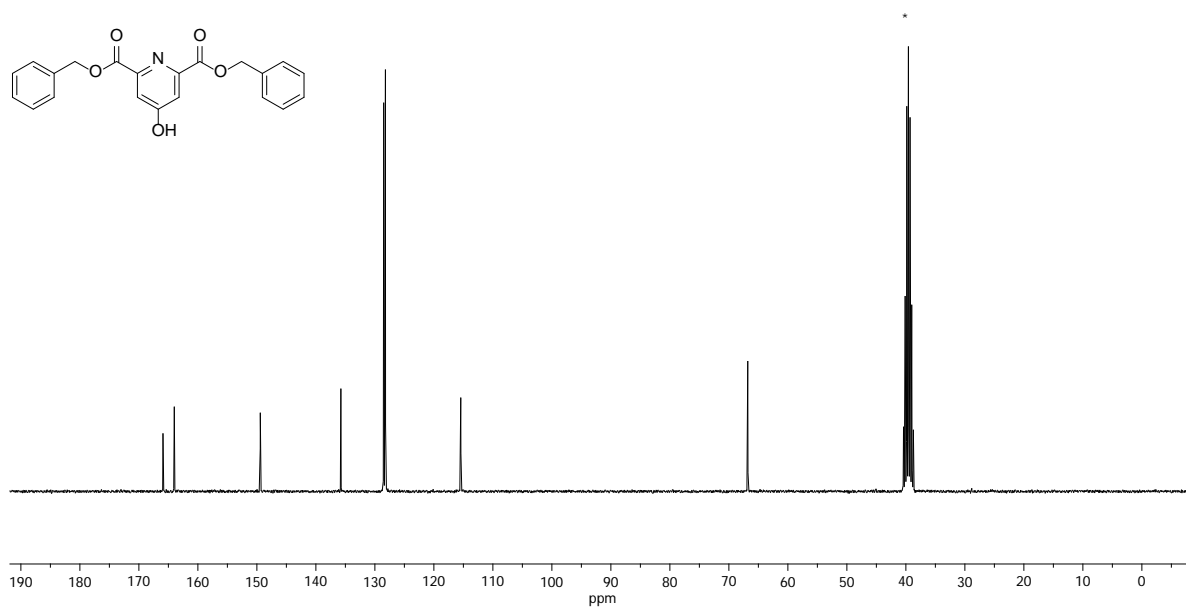

**Figure S2.** <sup>13</sup>C NMR spectrum of 4-hydroxypyridine-2,6-dicarboxylic acid dibenzyl ester, **2**. <sup>13</sup>C NMR (75 MHz, DMSO-*d*<sub>6</sub>) δ 165.90, 163.99, 149.40, 135.75, 128.48, 128.19, 115.42, 66.76.

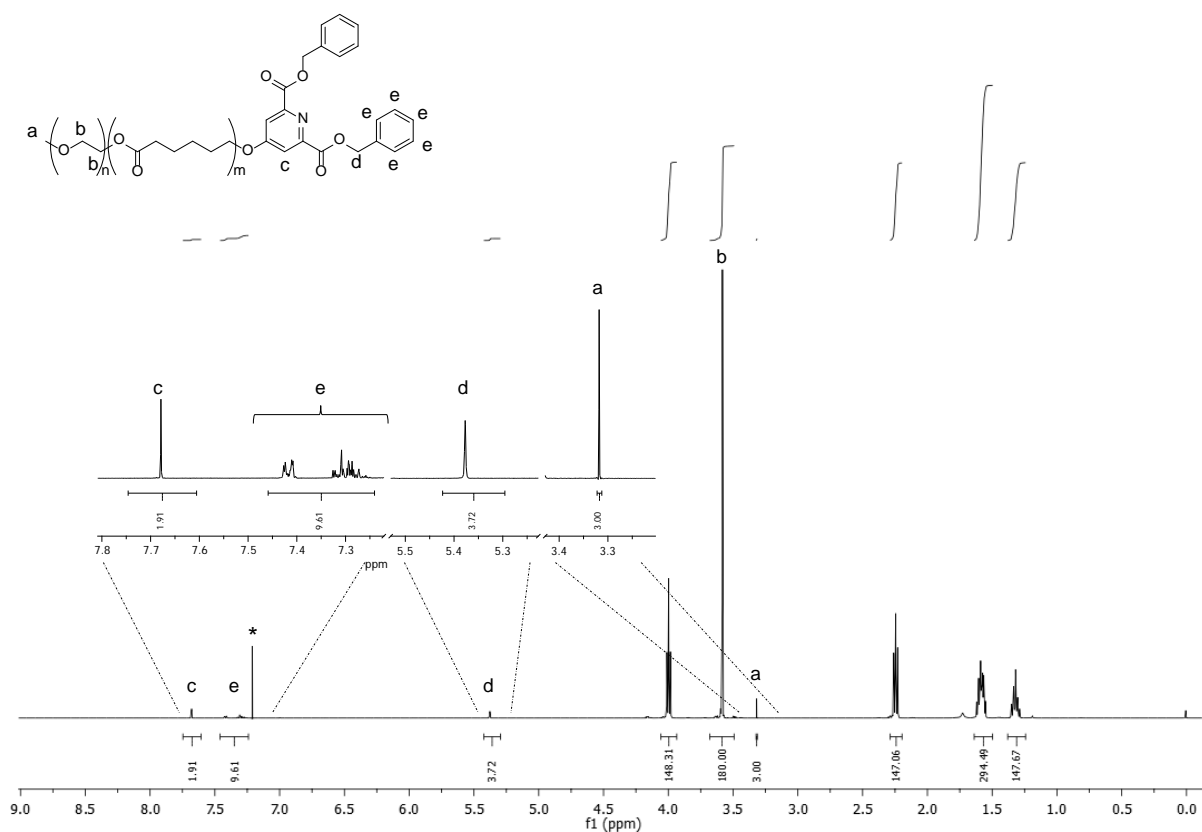

**Figure S3.** <sup>1</sup>H NMR spectrum of Bn<sub>2</sub>dpa-PCL-PEG-OCH<sub>3</sub>, **4**. <sup>1</sup>H NMR (500 MHz, CDCl<sub>3</sub>) δ 7.73 (s, PyrH), 7.54 – 7.29 (m, ArH), 5.43 (s, CH<sub>2</sub>Ph), 4.05 (t, *J* = 6.7 Hz, –CH<sub>2</sub>CH<sub>2</sub>O), 3.64 (s, PEG –CH<sub>2</sub>CH<sub>2</sub>–), 3.37 (s, PEG CH<sub>3</sub>OCH<sub>2</sub>), 2.31 (dt, *J* = 15.1, 7.6 Hz, –CO<sub>2</sub>CH<sub>2</sub>CH<sub>2</sub>–), 1.70–1.56 (m, –CH<sub>2</sub>CH<sub>2</sub>CH<sub>2</sub>CH<sub>2</sub>CH<sub>2</sub>–), 1.46–1.31 (m, –CH<sub>2</sub>CH<sub>2</sub>CH<sub>2</sub>–).

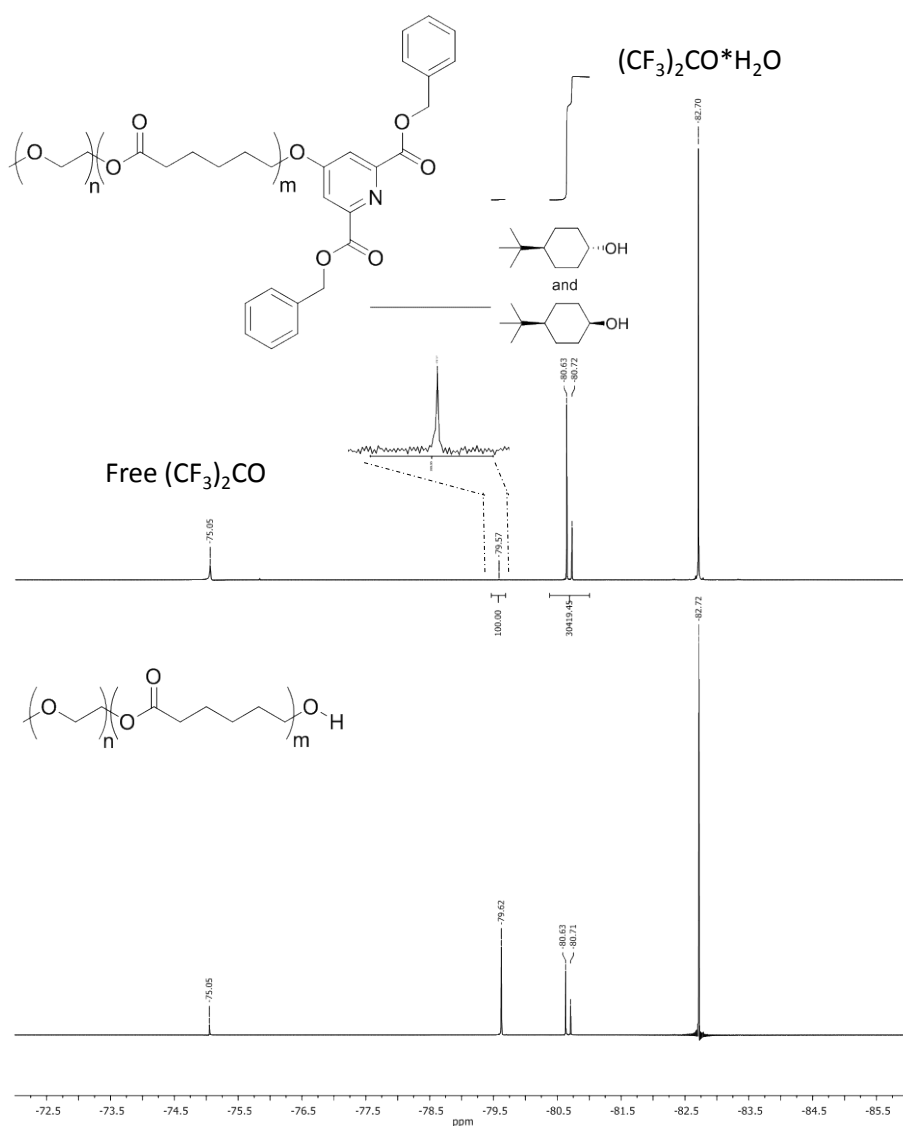

**Figure S4.**  $^{19}\text{F}$  NMR spectrum of  $\text{Bn}_2\text{dpa-PCL-PEG-OCH}_3$ , **4**. The degree of functionalization was determined by the relative integration of the peak of hexafluoroacetone (HFA)-adduct of mPEG-PCL-OH (-79.57 ppm) versus the peak of HFA-adduct of 4-tert-butylcyclohexanol (-80.63 ppm and -80.72 ppm) as internal standard.<sup>1</sup> A 99% end-group functionalization was found.

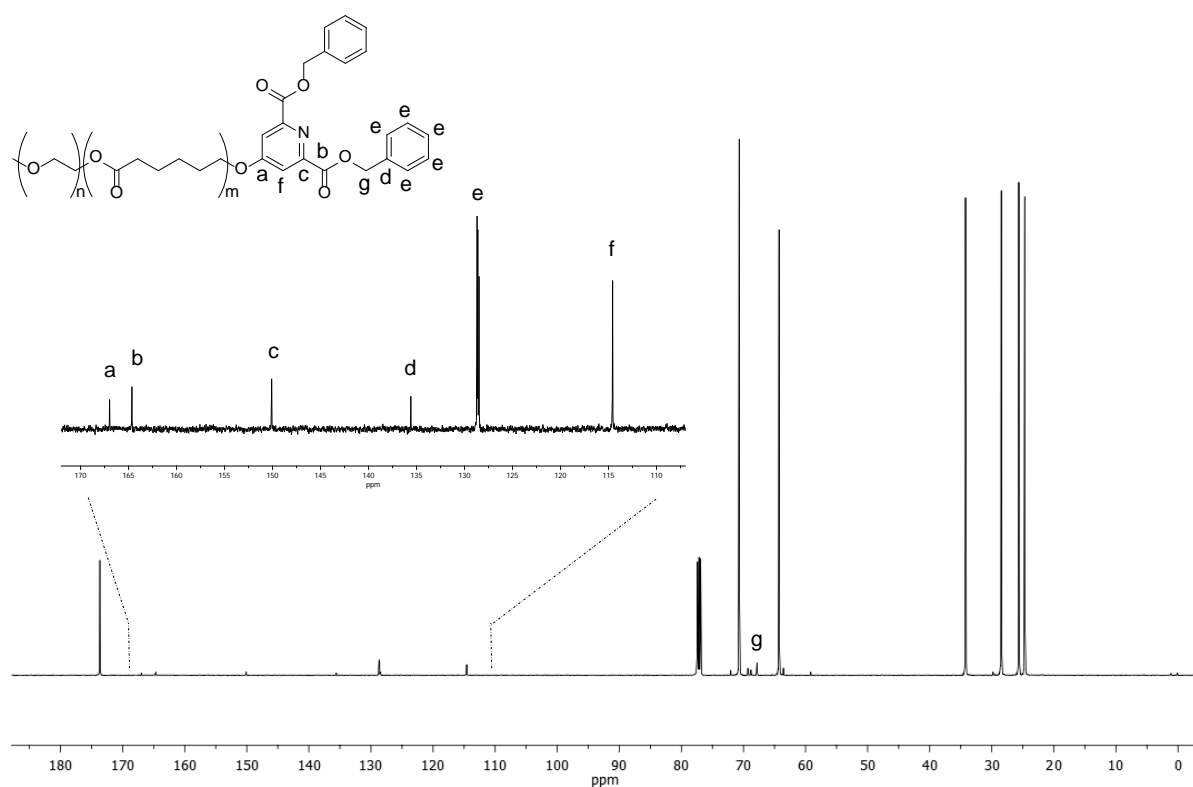

**Figure S5.** <sup>13</sup>C NMR spectrum of Bn<sub>2</sub>dpa-PCL-PEG-OCH<sub>3</sub>, **4**. <sup>13</sup>C NMR (126 MHz, CDCl<sub>3</sub>) δ 173.65, 166.98, 164.65, 150.07, 135.57, 128.70, 128.63, 128.50, 114.58, 70.67, 67.83, 64.27, 59.17, 34.26, 28.46, 25.64, 24.69.

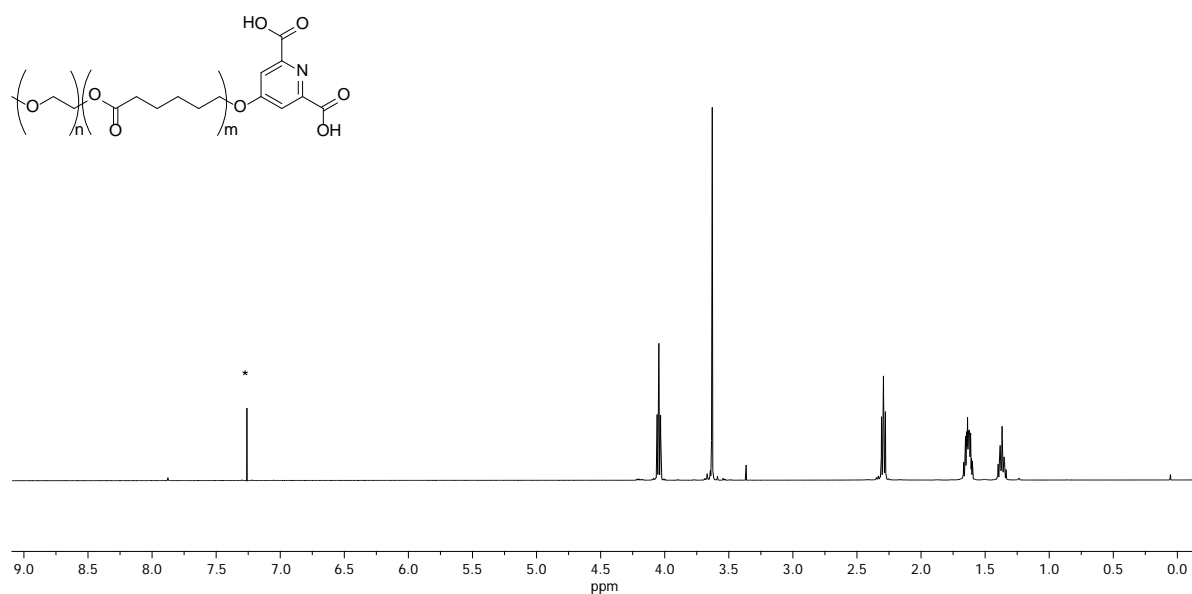

**Figure S6.**  $^1\text{H}$  NMR spectrum of dpa-PCL-PEG- $\text{OCH}_3$ , **5**.  $^1\text{H}$  NMR (500 MHz,  $\text{CDCl}_3$ )  $\delta$  7.86 (s, PyrH), 4.05 (t,  $J = 6.7$  Hz,  $-\text{CH}_2\text{CH}_2\text{O}$ ), 3.64 (s, PEG  $-\text{CH}_2\text{CH}_2-$ ), 3.37 (s, PEG  $\text{CH}_3\text{OCH}_2$ ), 2.30 (t,  $-\text{CO}_2\text{CH}_2\text{CH}_2-$ ), 1.69–1.58 (m,  $-\text{CH}_2\text{CH}_2\text{CH}_2\text{CH}_2\text{CH}_2-$ ), 1.42–1.33 (m,  $-\text{CH}_2\text{CH}_2\text{CH}_2-$ ).

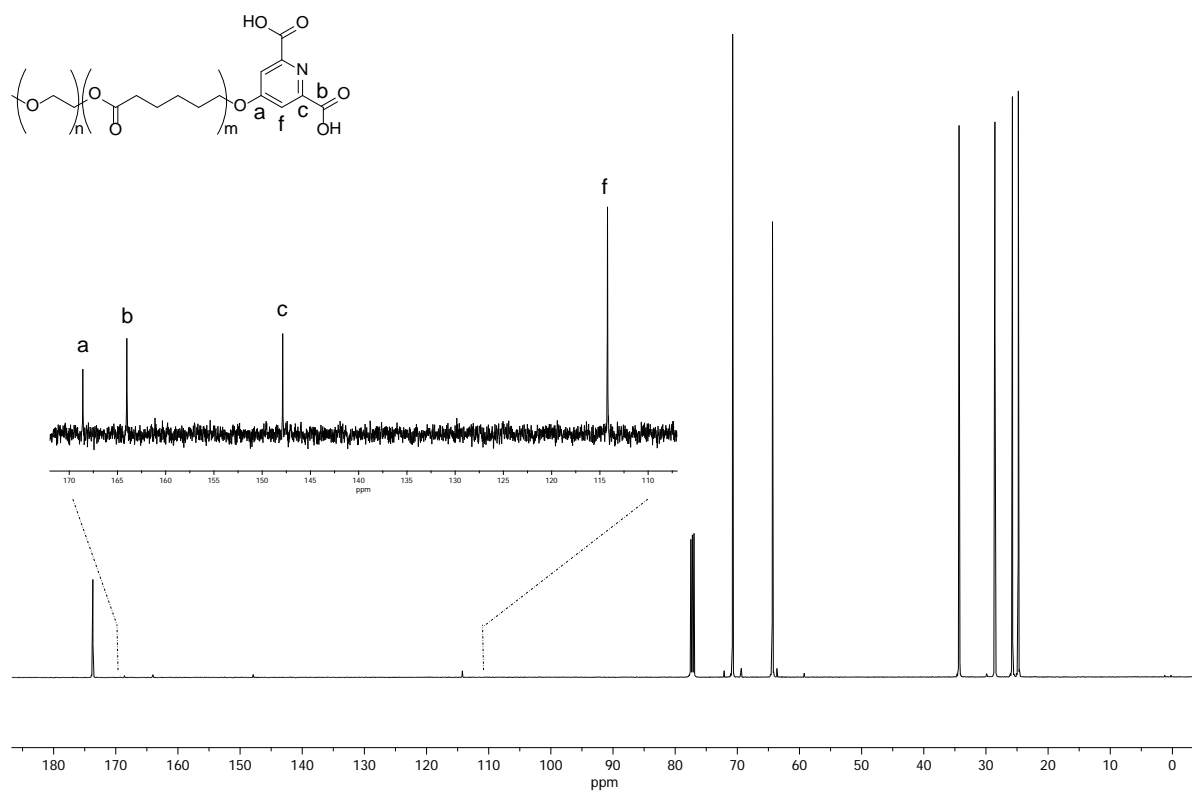

**Figure S7.** <sup>13</sup>C NMR dpa-PCL-PEG-OCH<sub>3</sub>, **5**. <sup>13</sup>C NMR (126 MHz, CDCl<sub>3</sub>) δ 173.68, 168.59, 164.03, 147.87, 114.19, 70.68, 64.27, 59.15, 34.24, 28.46, 25.64, 24.69.



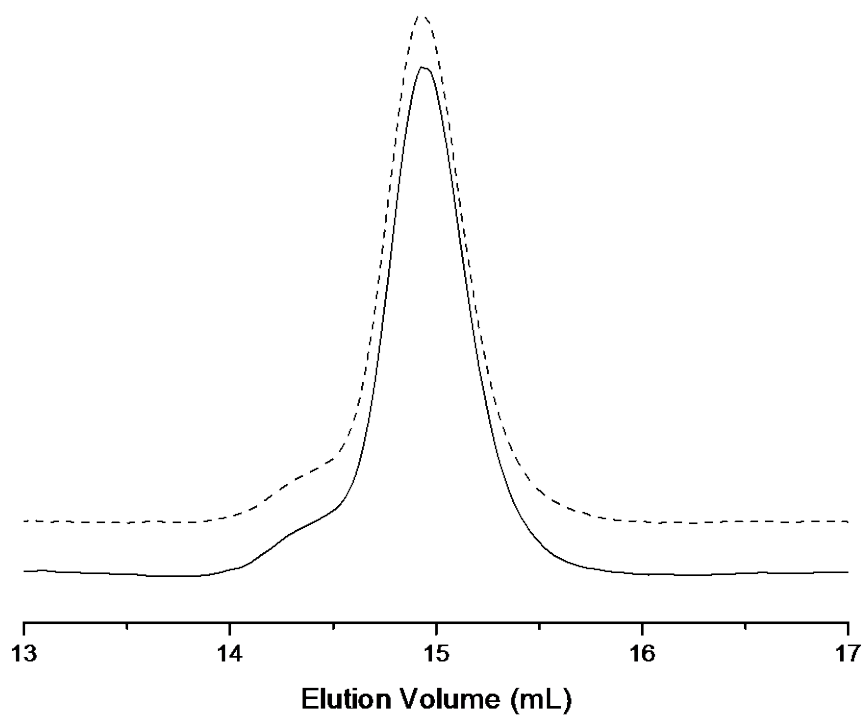

**Figure S8.** Gel permeation chromatography (GPC) traces of mPEG-PCL, **3**, (- - -) and Bn<sub>2</sub>dpa-PCL-PEG-OCH<sub>3</sub>, **4** (—) in THF (1 mL/min).

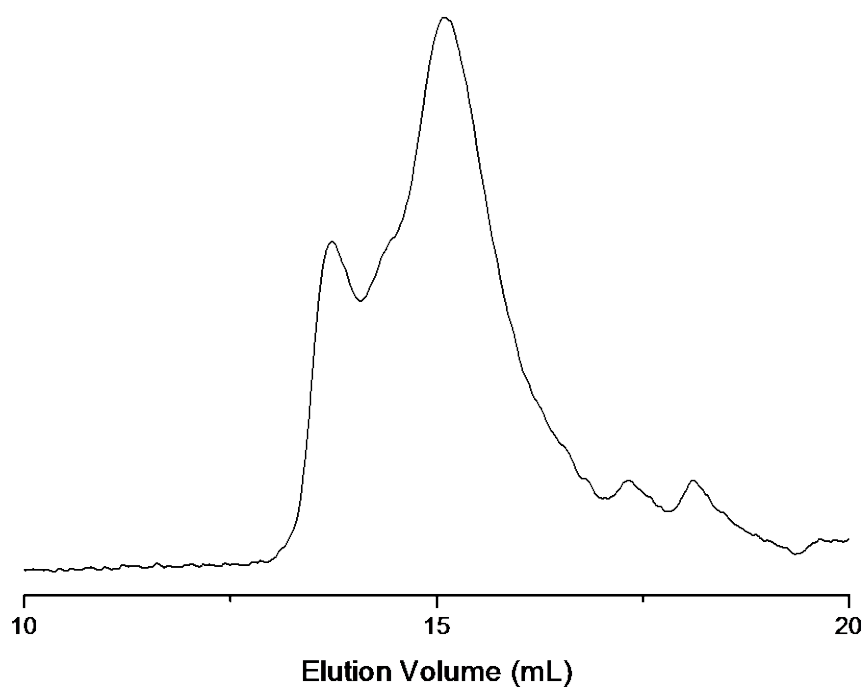

**Figure S9.** Gel permeation chromatography (GPC) traces of dpa-PCL-PEG-OCH<sub>3</sub>, **5** in THF (1 mL/min). The carboxyl groups of the dpa-polymer chain end resulted in significant interactions with the GPC columns.

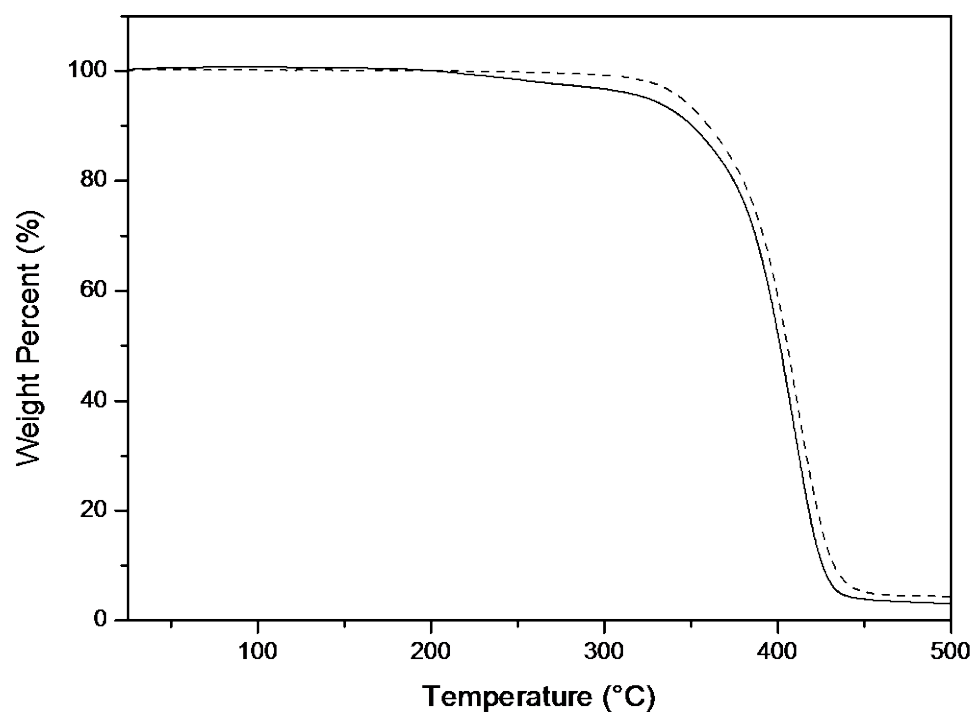

**Figure S10.** Thermogravimetric analysis (TGA) traces of  $\text{Bn}_2\text{dpa-PCL-PEG-OCH}_3$ , **4** (---) and  $\text{dpa-PCL-PEG-OCH}_3$ , **5** (—). The experiment was conducted at a heating rate of  $10^\circ\text{C/min}$  under a  $\text{N}_2$  atmosphere.

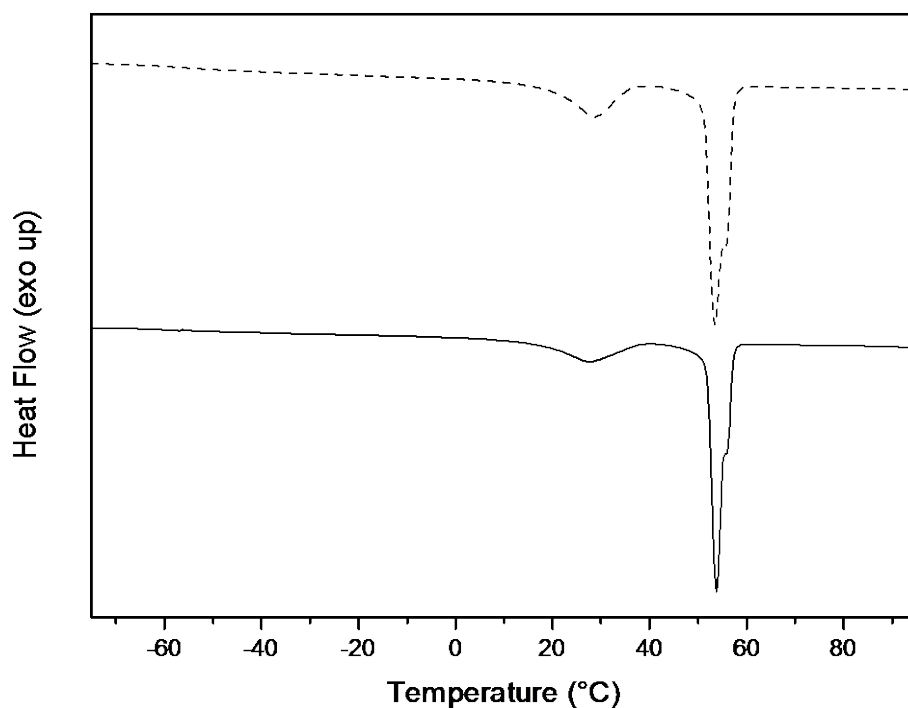

**Figure S11.** Modulated differential scanning calorimetry (DSC) curves of Bn<sub>2</sub>dpa-PCL-PEG-OCH<sub>3</sub>, **4** (---) and dpa-PCL-PEG-OCH<sub>3</sub>, **5** (—). The experiment was conducted with heating and cooling rates of 10° C/min under N<sub>2</sub> atmosphere and data from the second heating cycle is reported.

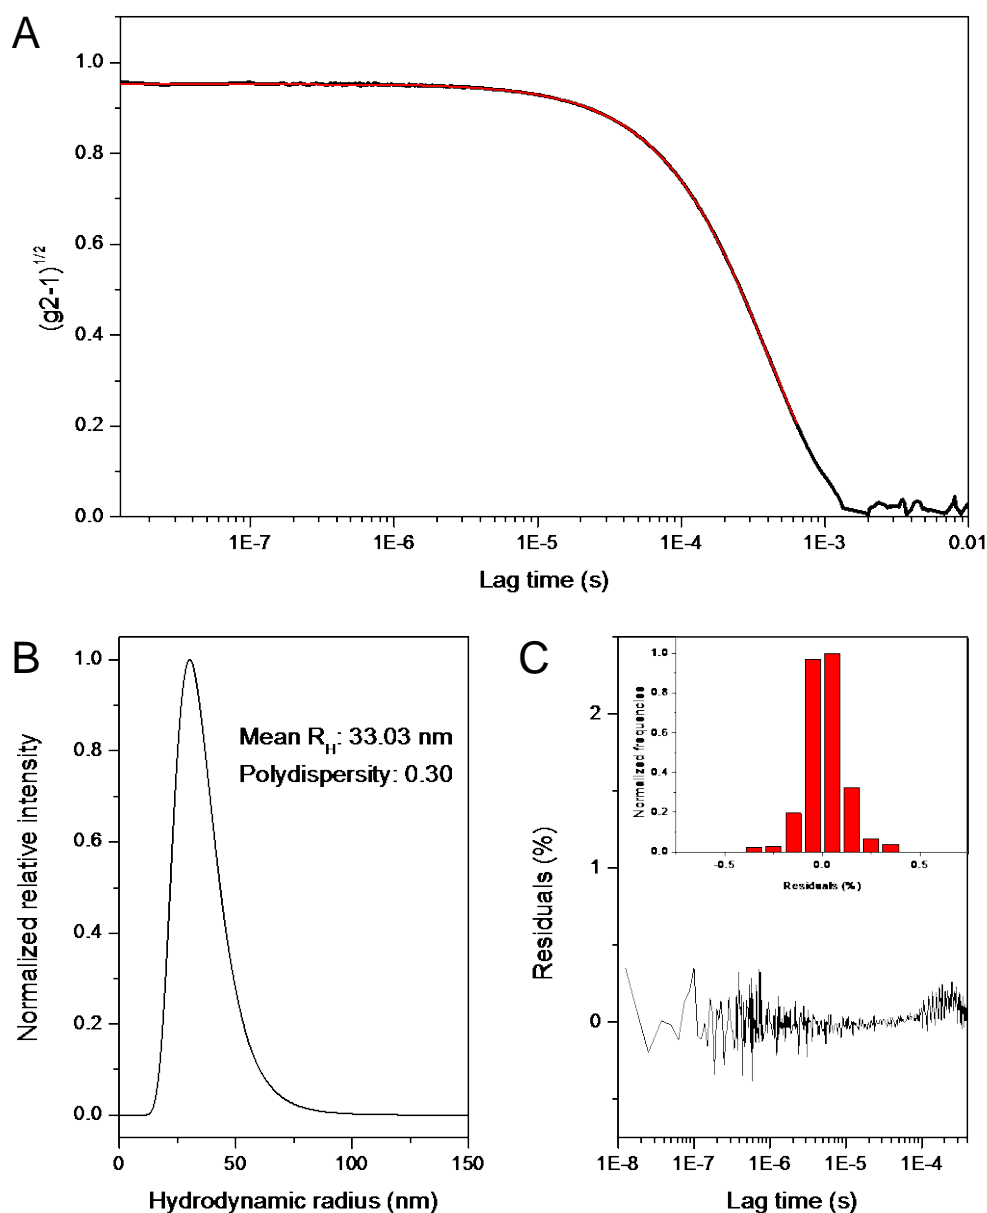

**Figure S12.** Dynamic light scattering (DLS) analysis of [Eu(5)<sub>3</sub>](HNEt<sub>3</sub>)<sub>3</sub> nanoparticles in water (0.5 mg/mL) prepared by addition of water into a DMF solution of [Eu(5)<sub>3</sub>](HNEt<sub>3</sub>)<sub>3</sub> (10 mg/mL). The intensity auto-correlation functions ( $g2$ ) were recorded at a scattering angle of 90° for 180 s at 25 °C in water. A viscosity of 0.893 mPa·s and a refractive index of 1.33 were used for calculation. (A) Square root of the autocorrelation function (black) and the corresponding fit using Schulz-Zimm distribution (red) are shown. (B) Intensity-weighted Schulz-Zimm distribution is shown. (C) Residuals of the measured data and the fitting with Schulz-Zimm distribution is shown.

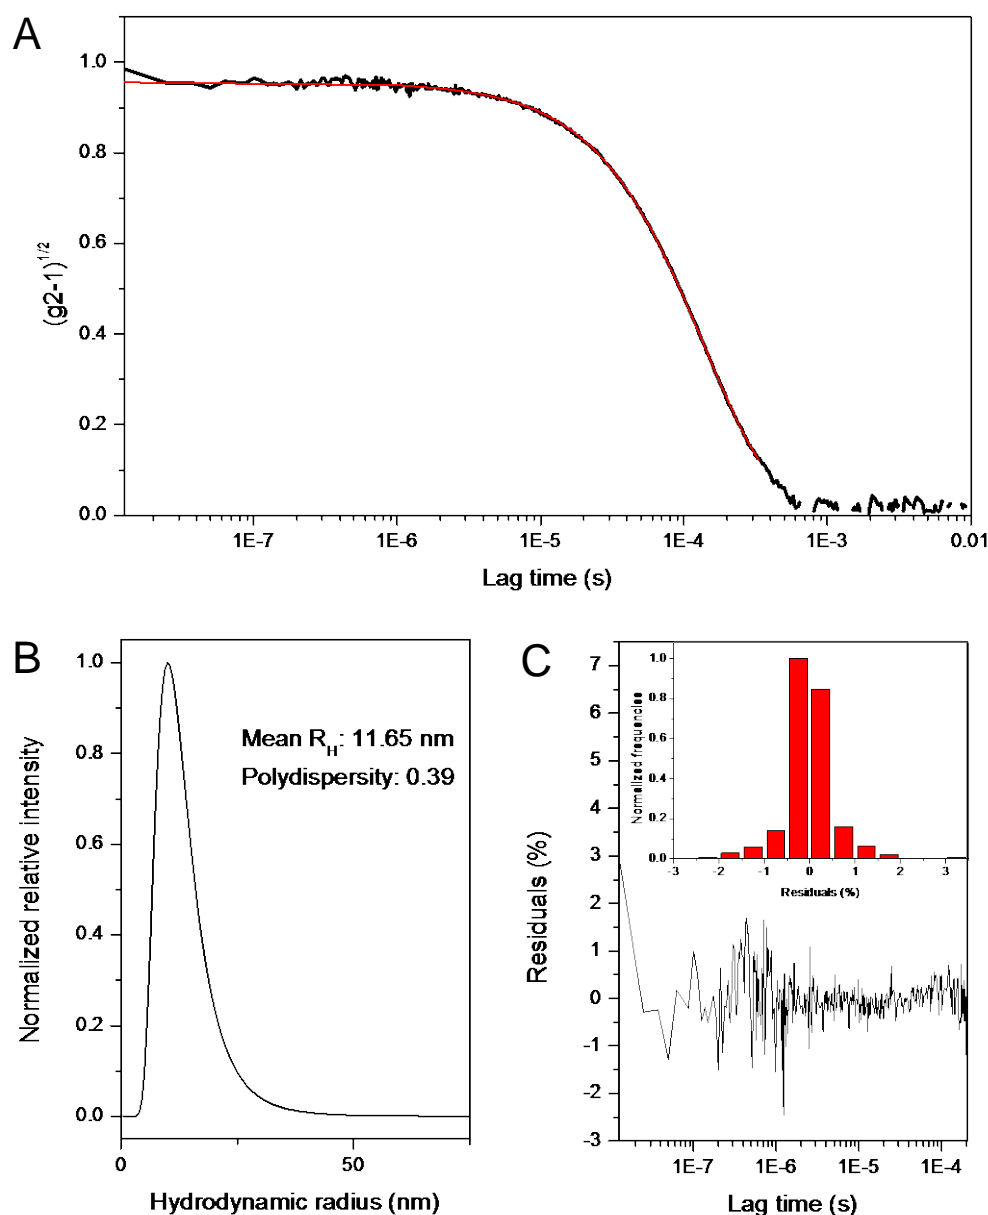

**Figure S13.** Dynamic light scattering (DLS) analysis of  $[\text{Eu}(\mathbf{5})_3](\text{HNEt}_3)_3$  nanoparticles in water (0.5 mg/mL) prepared by addition of a DMF solution of  $[\text{Eu}(\mathbf{5})_3](\text{HNEt}_3)_3$  (10 mg/mL) into water. The intensity auto-correlation functions ( $g_2$ ) were recorded at a scattering angle of  $90^\circ$  for 180 s at  $25^\circ\text{C}$  in water. A viscosity of 0.893 mPa·s and a refractive index of 1.33 were used for calculation. (A) Square root of the autocorrelation function (black) and the corresponding fit using Schulz-Zimm distribution (red) are shown. (B) Intensity-weighted Schulz-Zimm distribution is shown. (C) Residuals of the measured data and the fitting with Schulz-Zimm distribution is shown.

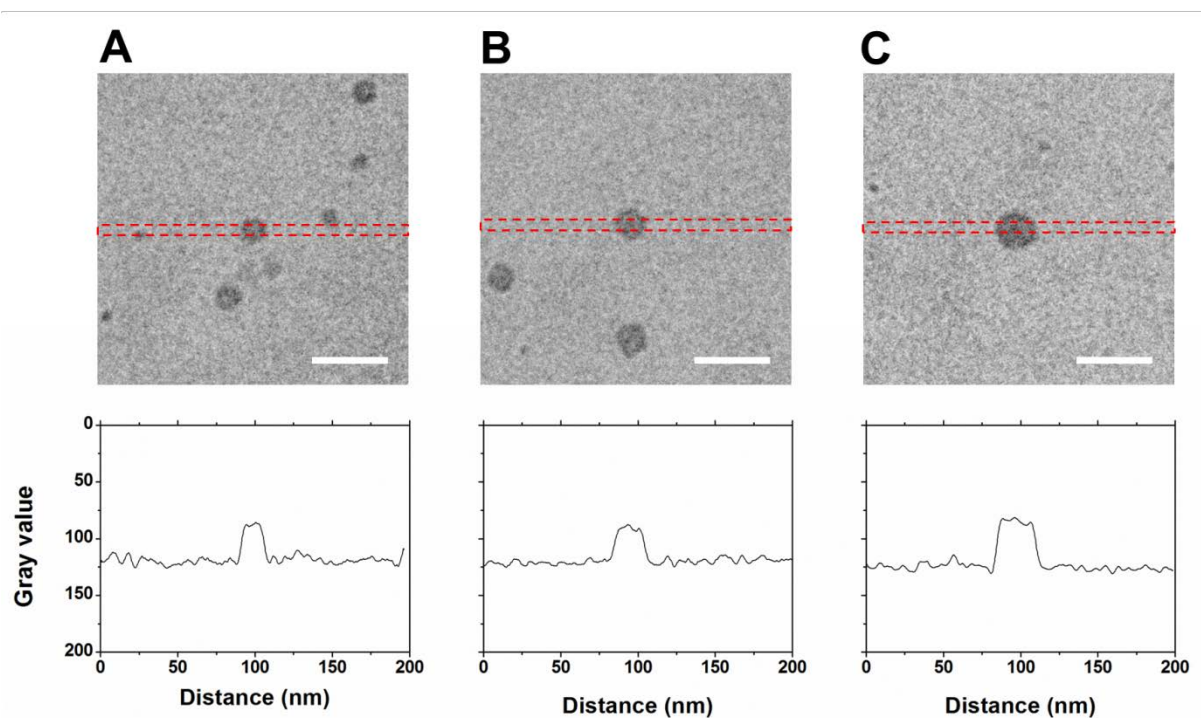

**Figure S14.** Representative cryo-TEM images of  $[\text{Eu}(\mathbf{5})_3](\text{HNEt}_3)_3$  nanoparticle suspensions. Nanoparticle samples were prepared using a solvent displacement method by slowly adding a  $[\text{Eu}(\mathbf{5})_3](\text{HNEt}_3)_3$  DMF solution to water. Cryo-TEM images of nanoparticles with increasing diameters ((A)  $d = 17$  nm, (B)  $d = 21$  nm and (C)  $d = 25$  nm) and the corresponding intensity profiles are shown. Scale bars = 50 nm.

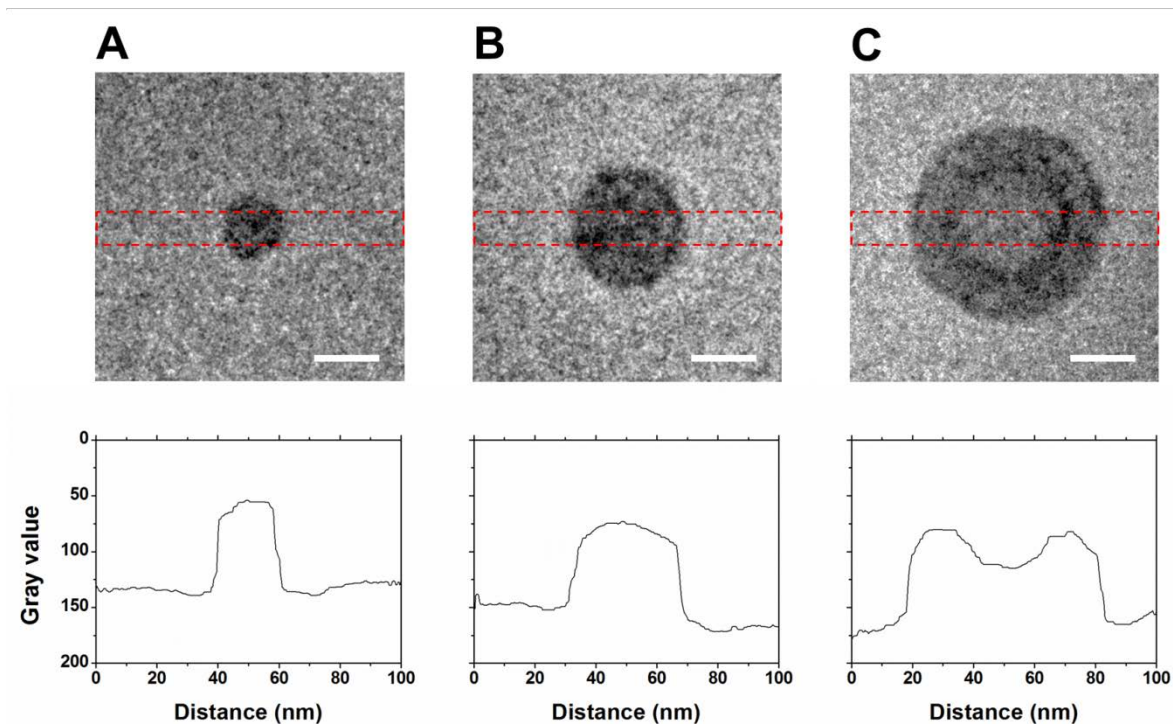

**Figure S15.** Representative cryo-TEM images of [Eu(5)<sub>3</sub>](HNEt<sub>3</sub>)<sub>3</sub> nanoparticle suspensions. Nanoparticle samples were prepared using a solvent displacement method by slowly adding water to a [Eu(5)<sub>3</sub>](HNEt<sub>3</sub>)<sub>3</sub> DMF solution. Cryo-TEM images of nanoparticles with increasing diameters ((A)  $d = 22$  nm, (B)  $d = 41$  nm and (C)  $d = 66$  nm) and the corresponding intensity profiles are shown. Scale bars = 20 nm.



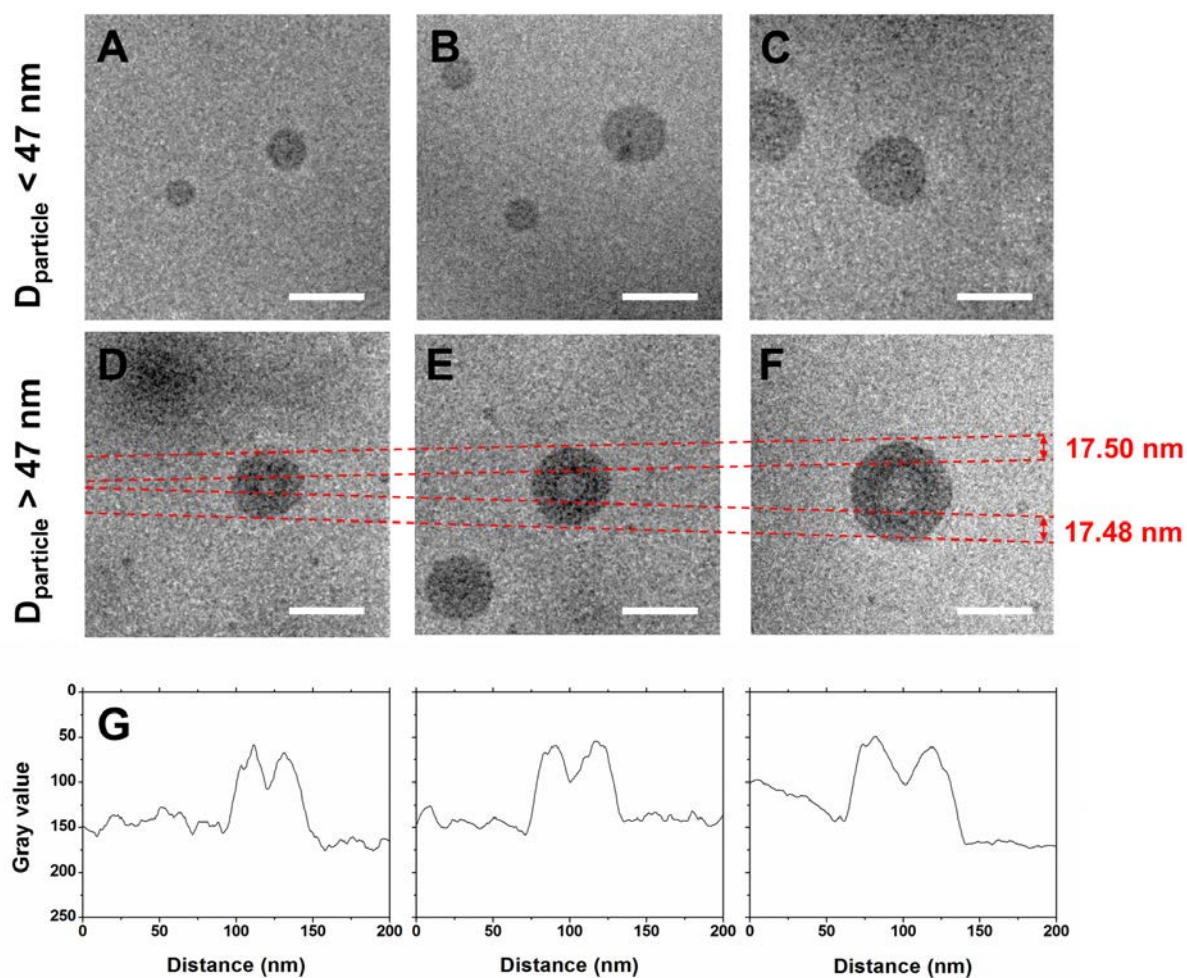

**Figure S16.** Representative cryo-TEM images of  $[\text{Eu}(\mathbf{5})_3](\text{HNEt}_3)_3$  nanoparticle suspensions. Micelle-like nanoparticles were obtained by the slow addition of water to a  $[\text{Eu}(\mathbf{5})_3](\text{HNEt}_3)_3$  DMF solution.. Nanoparticles with a diameter of less than  $47 \text{ nm}$  ((A)  $d < 24 \text{ nm}$ , (B)  $d = 34 \text{ nm}$  and (C)  $d = 44 \text{ nm}$ ) clearly resemble solid spheres. Images and intensity profiles of nanoparticles (G) with a diameter above  $47 \text{ nm}$  ((D)  $d = 48 \text{ nm}$ , (E)  $d = 55 \text{ nm}$ , and (F)  $d = 67 \text{ nm}$ ) exhibit a vesicle-like structure with a constant wall thickness of  $17.5 \text{ nm}$ . The intensity profile for the vesicle structure is represented below each respective cryo-TEM image. Scale bars =  $50 \text{ nm}$ .

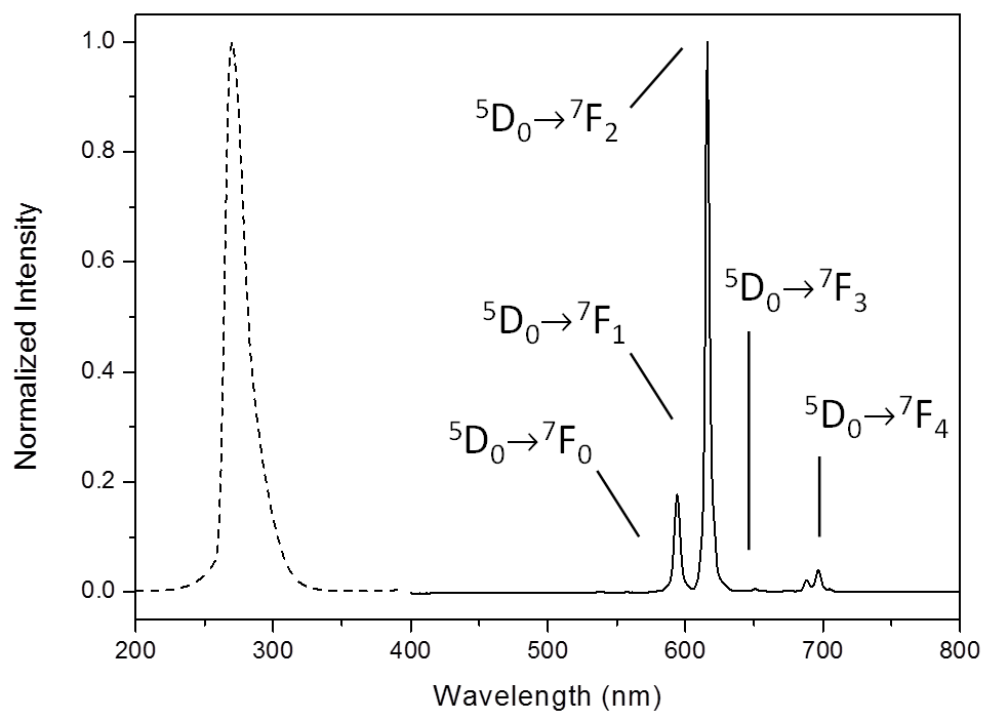

**Figure S17.** Excitation and emission spectra of  $[\text{Eu}(\mathbf{5})_3](\text{HNEt}_3)_3$  in DMF (1 mg/mL). The excitation spectrum (---) was recorded with a fixed emission at 615 nm. The emission spectrum (—) was recorded with a fixed excitation at 270 nm.

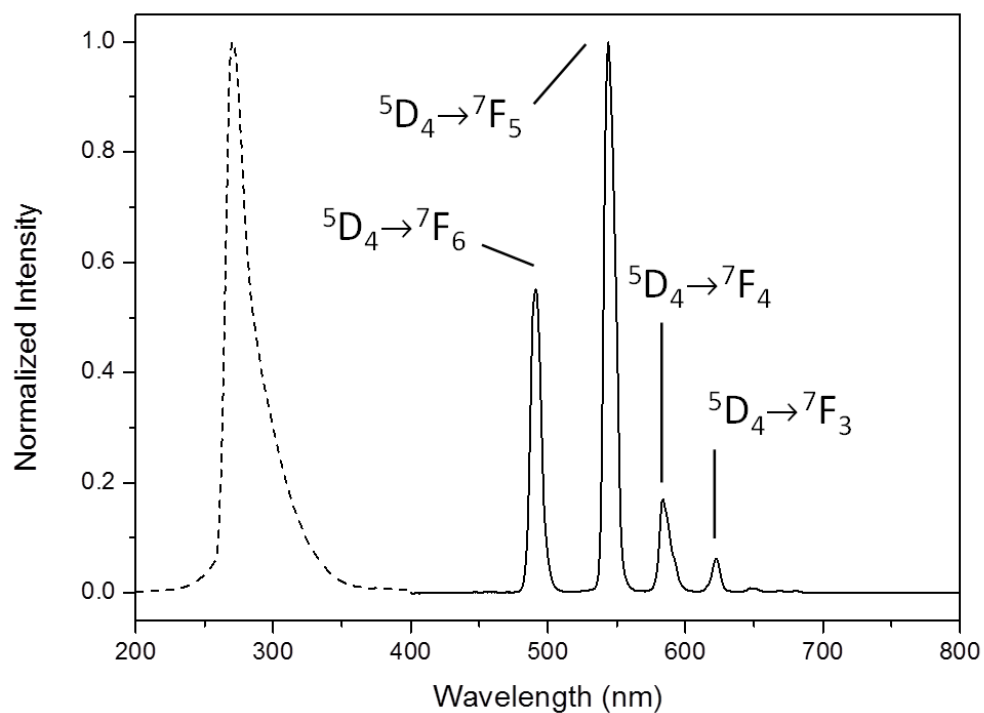

**Figure S18.** Excitation and emission spectra of  $[\text{Tb}(\mathbf{5})](\text{HNEt}_3)_3$  in DMF (1 mg/mL). The excitation spectrum (---) was recorded with a fixed emission at 615 nm. The emission spectrum (—) was recorded with a fixed excitation at 270 nm.

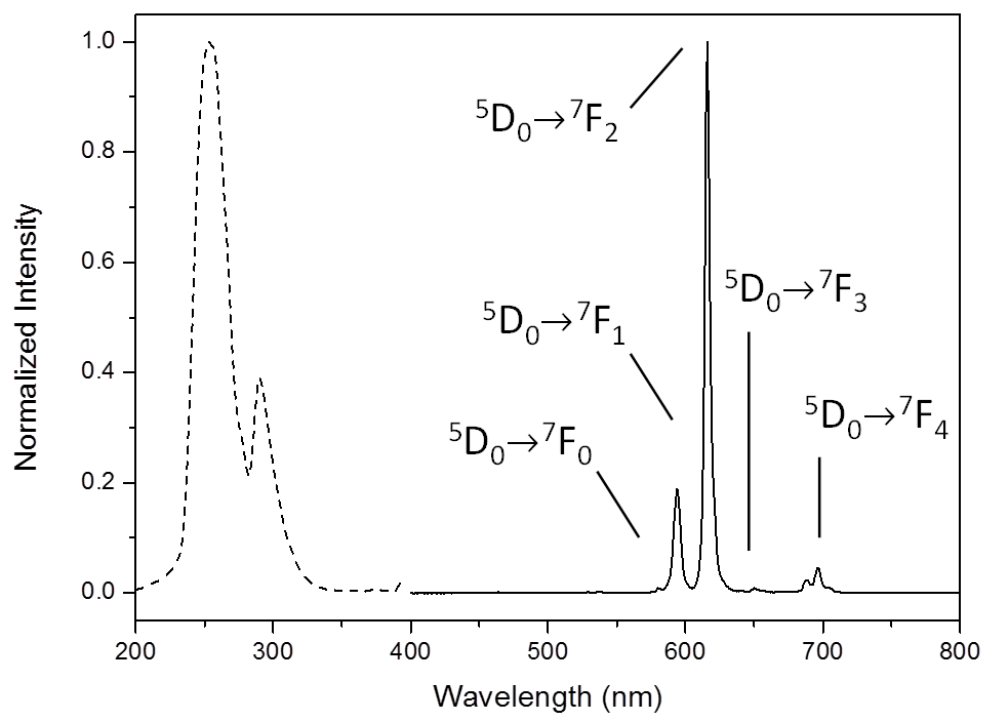

**Figure S19.** Excitation and emission spectra of  $[\text{Eu}(\mathbf{5})_3](\text{HNEt}_3)_3$  in THF (1 mg/mL). The excitation spectrum (---) was recorded with a fixed emission at 615 nm. The emission spectrum (—) was recorded with a fixed excitation at 270 nm.

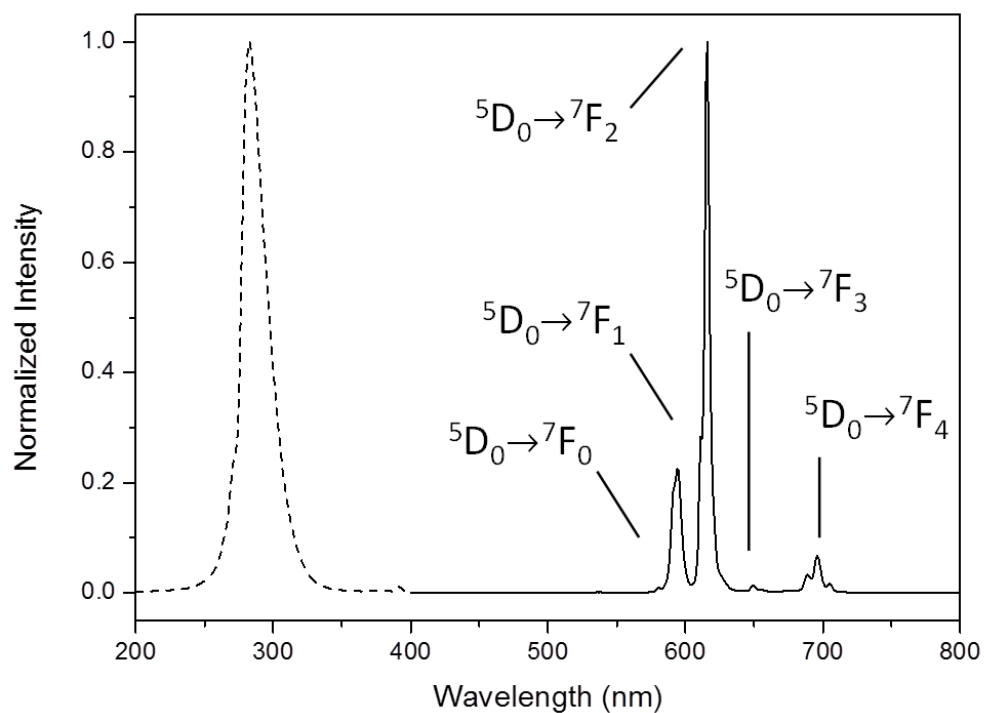

**Figure S20.** Excitation and emission spectra of [Eu(dpa)<sub>3</sub>](HNEt<sub>3</sub>)<sub>3</sub> in DMF ( $1.6 \times 10^{-4}$  g/mL). The excitation spectrum (---) was recorded with a fixed emission at 615 nm. The emission spectrum (—) was recorded with a fixed excitation at 270 nm.

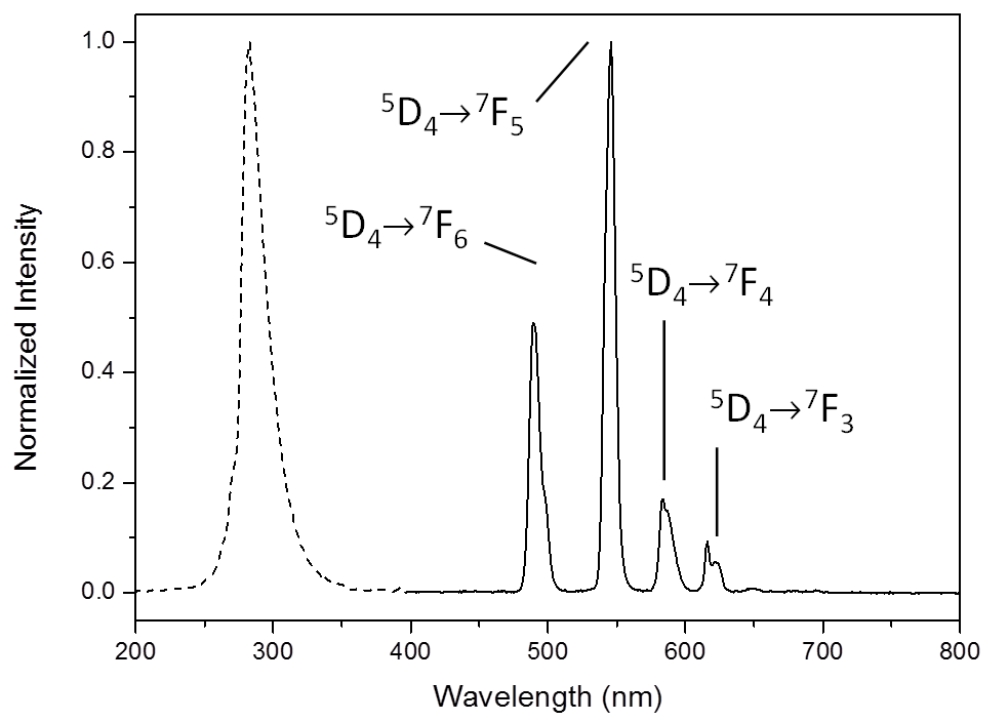

**Figure S21.** Excitation and emission spectra of  $[\text{Tb}(\text{dpa})_3](\text{HNEt}_3)_3$  in DMF ( $1.6 \times 10^{-4}$  g/mL). The excitation spectrum (---) was recorded with a fixed emission at 615 nm. The emission spectrum (—) was recorded with a fixed excitation at 270 nm.

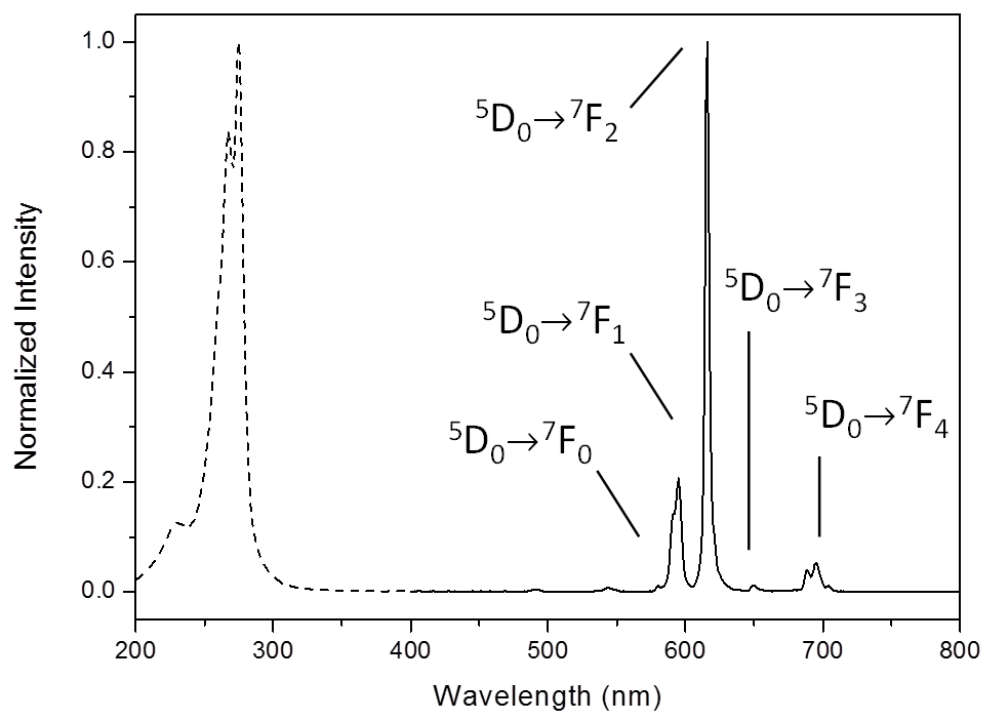

**Figure S22.** Excitation and emission spectra of  $[\text{Eu}(\text{dpa})_3](\text{HNEt}_3)_3$  in water ( $1.6 \times 10^{-4}$  g/mL). The excitation spectrum (---) was recorded with a fixed emission at 615 nm. The emission spectrum (—) was recorded with a fixed excitation at 270 nm.

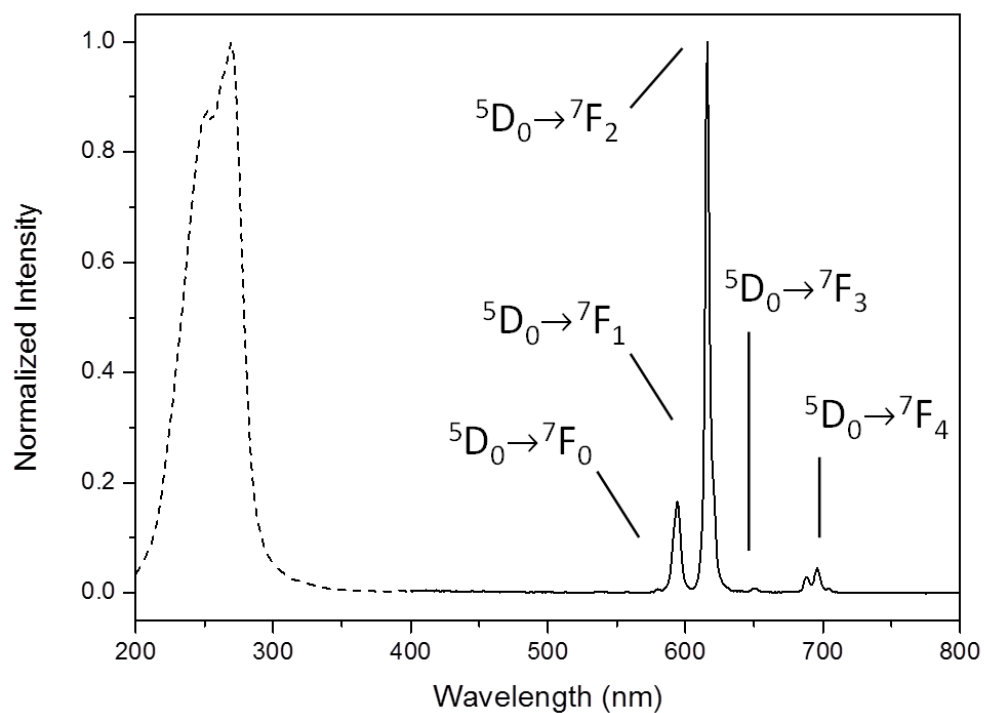

**Figure S23.** Excitation and emission spectra of  $[\text{Eu}(\mathbf{5})_3](\text{HNEt}_3)_3$  nanoparticles in PBS (0.5 mg/mL). The excitation spectrum (---) was recorded with a fixed emission at 615 nm. The emission spectrum (—) was recorded with a fixed excitation at 270 nm.



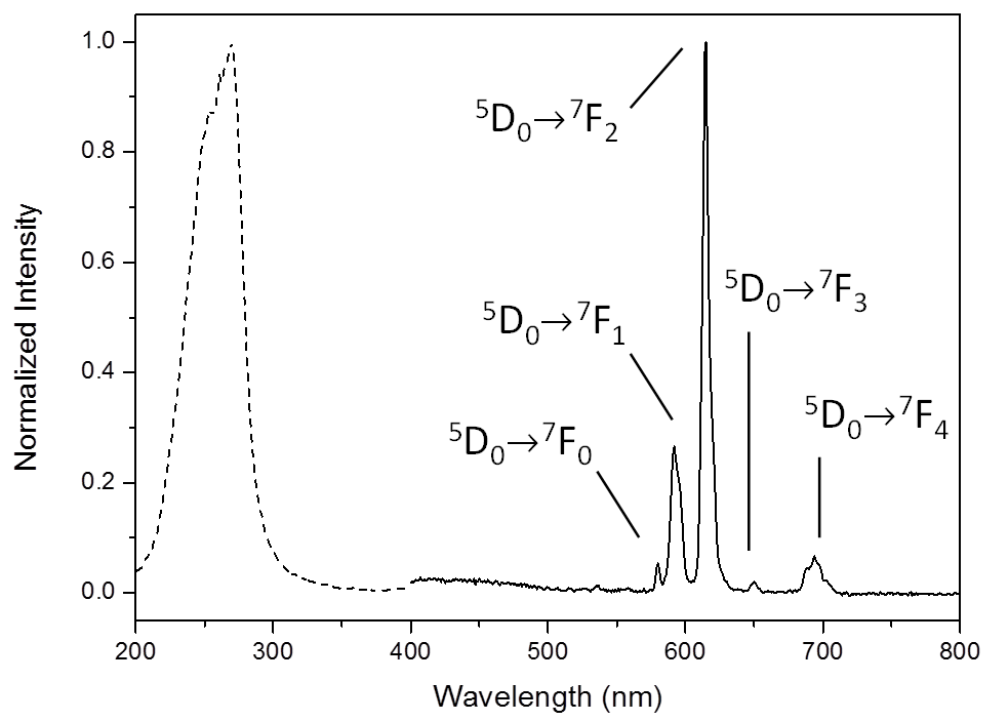

**Figure S24.** Excitation and emission spectra of  $[\text{Eu}(\mathbf{5})_3](\text{HNEt}_3)_3$  nanoparticles in water (0.5 mg/mL). The excitation spectrum (---) was recorded with a fixed emission at 615 nm. The emission spectrum (—) was recorded with a fixed excitation at 270 nm. Nanoparticles were prepared by the addition of **5** in DMF/triethylamine to stirring water and followed by dialysis against water (2 days). A solution of  $\text{EuCl}_3$  in water was then added to the nanoparticle suspension and the emission spectrum was recorded after a delay of 5 minutes.

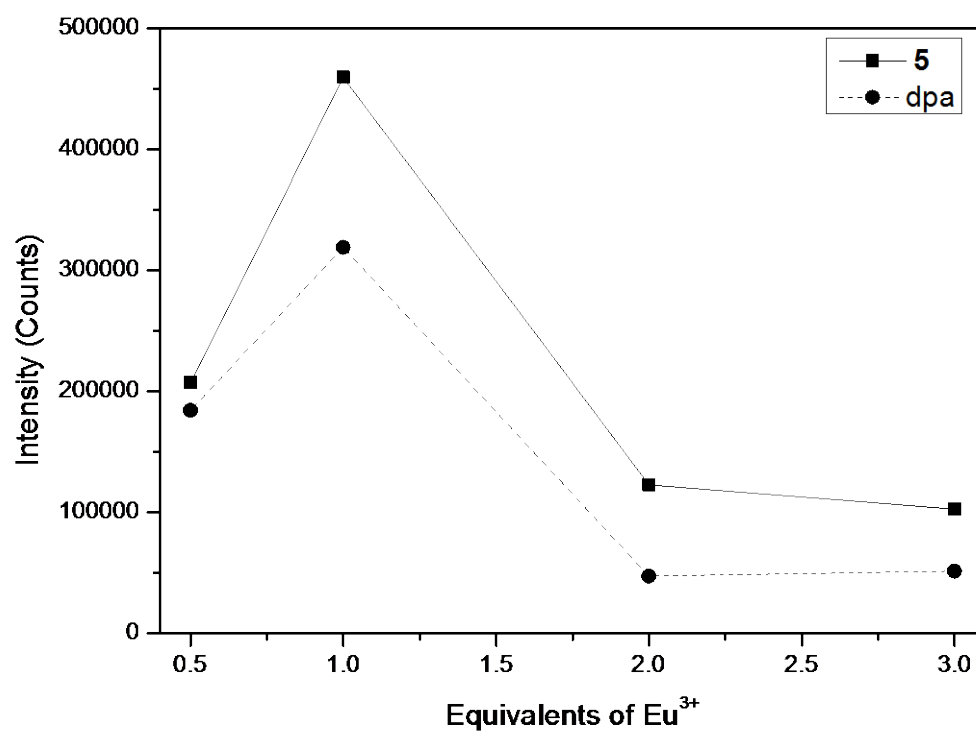

**Figure S25.** Europium titration experiment. Emission intensity at 615 nm was recorded versus the equivalents of  $\text{Eu}^{3+}$  added to 3 equivalents of ligand (dpa or **5**) in DMF.

## References

- (1) Keizer, H. M.; van Kessel, R.; Sijbesma, R. P.; Meijer, E. W. *Polymer* **2003**, *44*, 5505-5511.
